# Supplementary material for: Effect of ZnMgO2 nanoparticles used as a nanofertilizer: promoting the growth activities of rice seedlings
Source: Royal Society of Chemistry journal article supplement (doi:10.1039/d3en00770g), 2024-01-01
Supplement: d3en00770g1.pdf [file d3en00770g1.pdf]

## Supporting information

### Effect of ZnMgO<sub>2</sub> nanoparticles used as a nano fertilizer: Promote the growth activities of rice seedling

Sajid Mehmood,<sup>a</sup> Niteesh Kumar,<sup>a</sup> Aadil Mansoori,<sup>b</sup> Madan Mohan,<sup>b</sup> Anirudh Kumar,  
bc Tanmay Kumar Ghorai<sup>a,\*</sup>

<sup>a</sup>Nanomaterials and Crystal Design Laboratory, Department of Chemistry, Indira Gandhi National Tribal University, Amarkantak, Madhya Pradesh 484887, India

<sup>b</sup>Department of Botany, Indira Gandhi National Tribal University, Amarkantak, Madhya Pradesh 484887, India

<sup>c</sup>Department of Botany, Central Tribal University of AP, Vizianagaram-535003, A.P., India

\*Corresponding author. E-mail: [tanmay.ghorai@igntu.ac.in](mailto:tanmay.ghorai@igntu.ac.in),

Ph. No.: +919432512461; Fax: 07629-269712

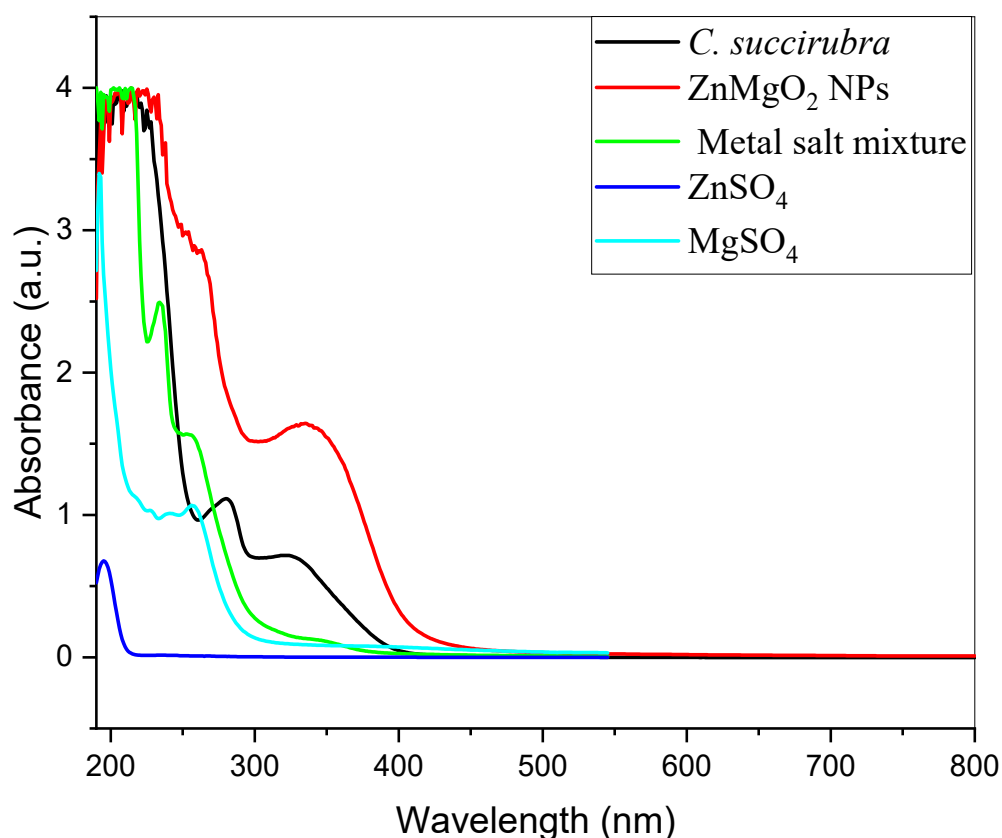

SI Figure 1. UV-visible spectrum of ZnMgO<sub>2</sub> nanoparticles, their salts and *C. succirubra* leaf extract

## Synthesis of ZnMgO<sub>2</sub> NPs

*Cinchona succirubra* leaf extract was employed as a capping and stabilizing ingredient by employing the green syntheses approach. Additionally, the phytochemicals included in leaf extract, such as polyphenols, flavonoids, glycosides, and tannins, function as a reducing agent.<sup>1</sup>

### Fourier Transforms Infrared (FTIR) Spectroscopy

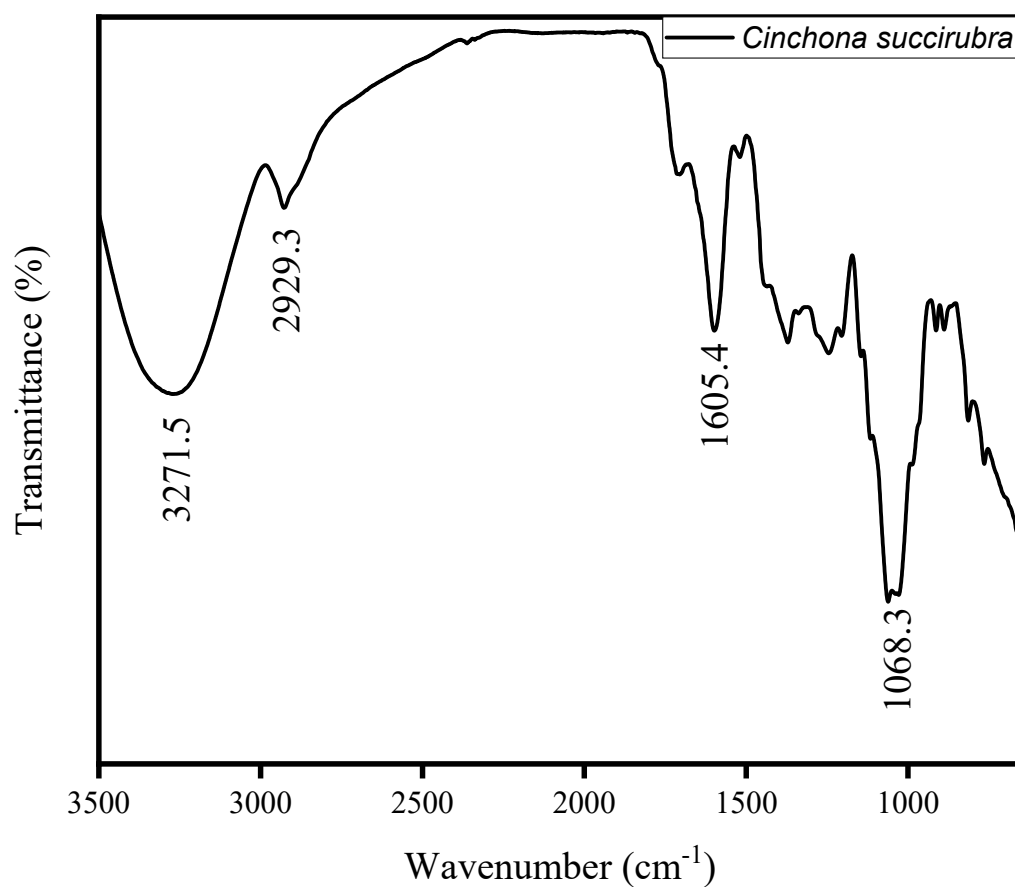

**SI Figure 2.** Fourier-transform infrared spectroscopy (FTIR) spectrum of *Cinchona succirubra* leaf extract

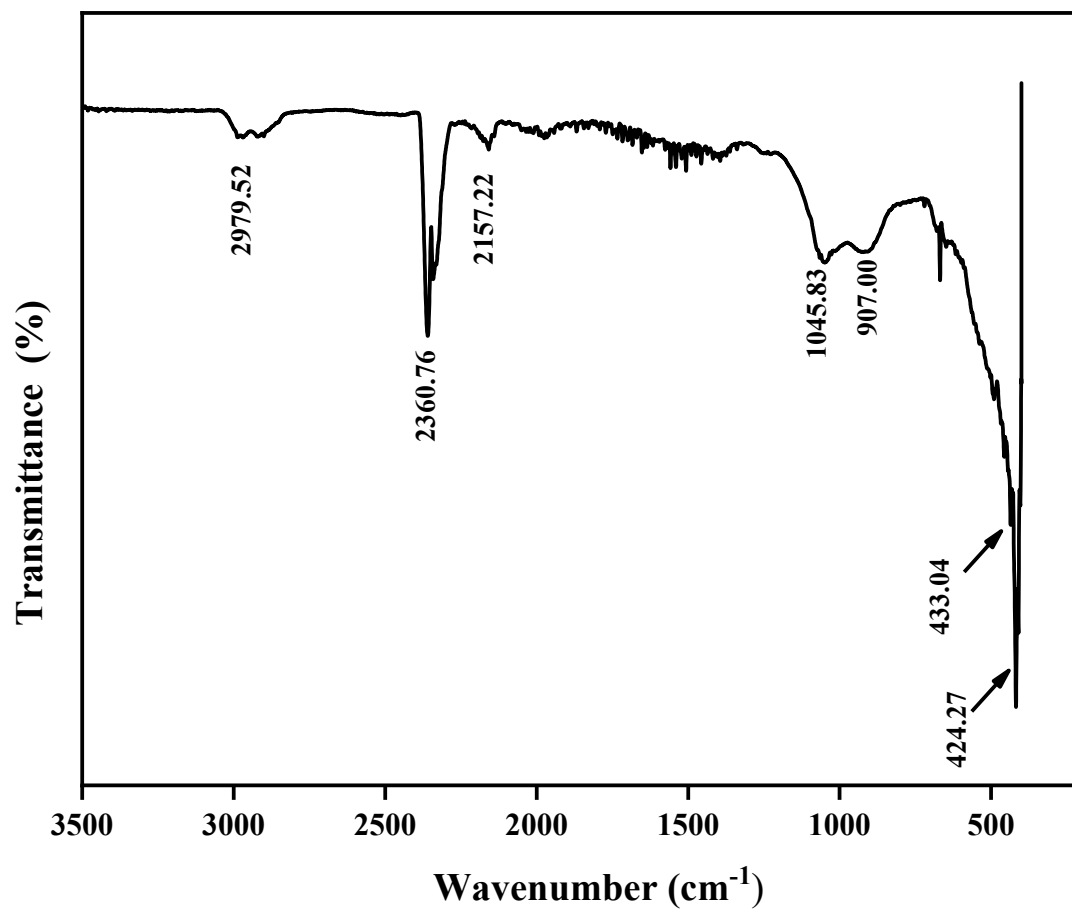

SI Figure 3. Fourier-transform infrared spectroscopy (FTIR) spectrum of ZnMgO<sub>2</sub>.

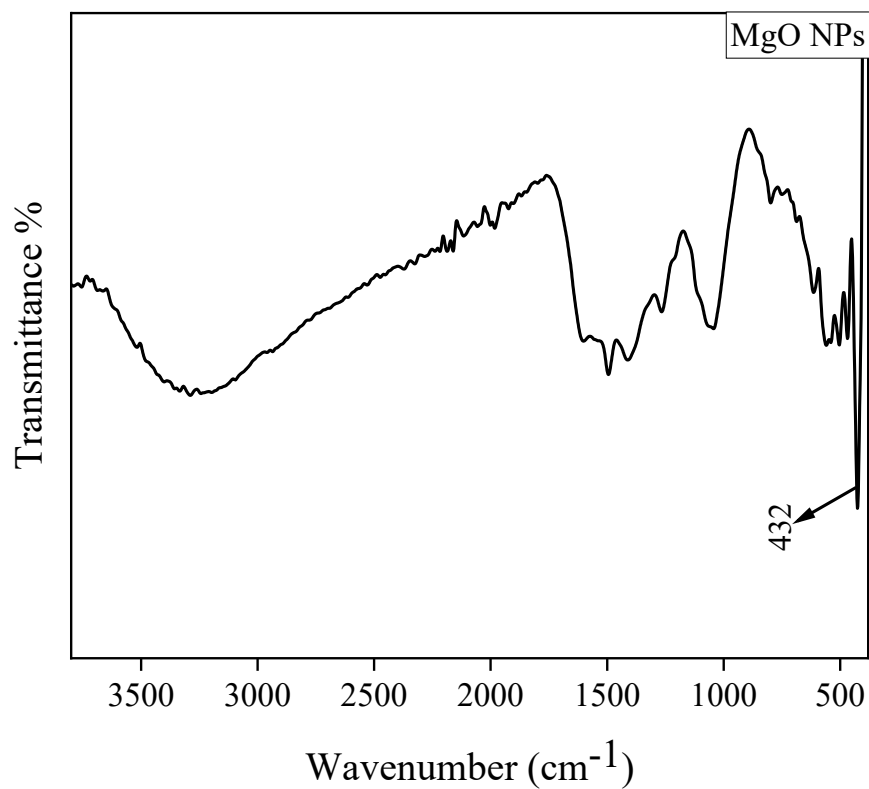

**SI Figure 4.** Fourier-transform infrared spectroscopy (FTIR) spectrum of MgO.

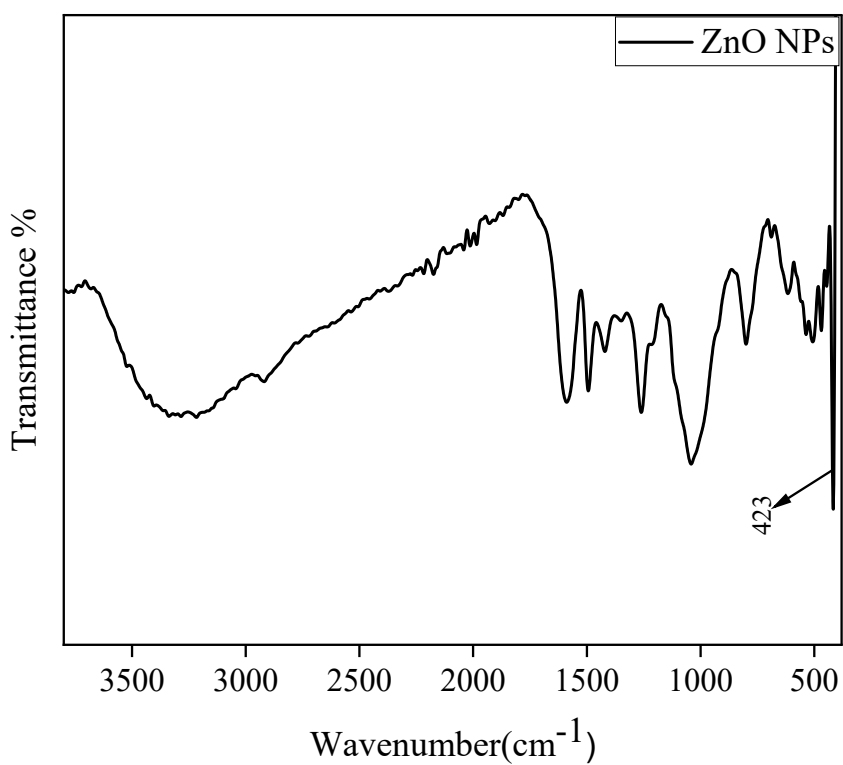

**SI Figure 5.** Fourier-transform infrared spectroscopy (FTIR) spectrum of ZnO.

### Compared chart for M-O stretching frequency in different composites

| Composites             | Stretching Frequency (cm <sup>-1</sup> ) |        |
|------------------------|------------------------------------------|--------|
|                        | Mg-O                                     | Zn-O   |
| ZnMgO <sub>2</sub> NPs | 433.0                                    | 424.27 |
| MgO NPs                | 432                                      | -      |
| ZnO NPs                | -                                        | 423    |

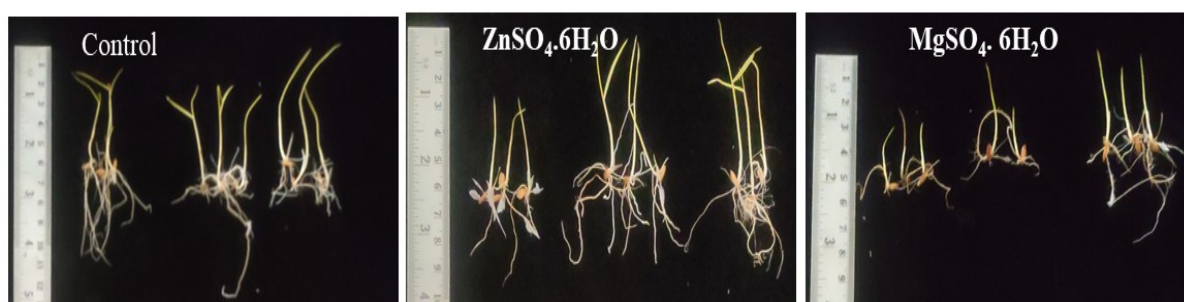

SI Figure 6. Images of rice seedlings treated with metal salts (ZnSO<sub>4</sub>&MgSO<sub>4</sub>)

**SI Table 1.** Metal salts treated (ZnSO<sub>4</sub>&MgSO<sub>4</sub>) rice root length.

| Samples                   | Root length (on 7 <sup>th</sup> day) |
|---------------------------|--------------------------------------|
| Control                   | 5.92±0.75 cm                         |
| ZnSO <sub>4</sub> 25 mg/L | 4.67±1.35 cm                         |
| ZnSO <sub>4</sub> 75 mg/L | 5.51±0.36 cm                         |
| MgSO <sub>4</sub> 25 mg/L | 4.36±0.58 cm                         |
| MgSO <sub>4</sub> 75 mg/L | 4.40±0.68 cm                         |

**SI Table 2.** Metal salts treated (ZnSO<sub>4</sub>&MgSO<sub>4</sub>) rice shoot length.

| Samples                   | Shoot length (on 7 <sup>th</sup> day) |
|---------------------------|---------------------------------------|
| Control                   | 3.75±0.54 cm                          |
| ZnSO <sub>4</sub> 25 mg/L | 4.76±1.35 cm                          |
| ZnSO <sub>4</sub> 75 mg/L | 5.54±0.69 cm                          |
| MgSO <sub>4</sub> 25 mg/L | 4.66±0.68 cm                          |
| MgSO <sub>4</sub> 75 mg/L | 2.95±0.36 cm                          |

**SITable 3.** Root length of rice seedlings treated with ZnMgO<sub>2</sub> NPs.

| Samples                   | Day 20       | Day 40       | Day 60       |
|---------------------------|--------------|--------------|--------------|
| Control                   | 4.25±1.07 cm | 4.74±0.83 cm | 5.11±1.11 cm |
| ZnMgO <sub>2</sub> 25mg/L | 6.25±0.58 cm | 7.35±1.28 cm | 7.88±1.28 cm |
| ZnMgO <sub>2</sub> 75mg/L | 7.18±1.29 cm | 7.26±0.68 cm | 7.35±0.80 cm |
| Urea (U) 25 mg/L          | 4.93±0.51 cm | 4.87±1.24 cm | 5.47±0.88 cm |
| Urea (U) 75 mg/L          | 4.46±0.59 cm | 4.47±1.06 cm | 4.84±0.62 cm |

**SI Table 4.** Shoot length of rice seedlings treated with ZnMgO<sub>2</sub> NPs.

| Samples                    | Day 20        | Day 40        | Day 60        |
|----------------------------|---------------|---------------|---------------|
| Control                    | 11.88±1.11 cm | 14.73±2.95 cm | 20.97±3.29 cm |
| ZnMgO <sub>2</sub> 25 mg/L | 16.03±0.71 cm | 17.27±1.66 cm | 23.90±1.49 cm |
| ZnMgO <sub>2</sub> 75 mg/L | 16.65±2.02 cm | 18.36±1.43 cm | 22.11±1.90 cm |
| Urea (U) 25 mg/L           | 13.75±1.05 cm | 14.32±2.21 cm | 23.11±2.93 cm |
| Urea (U) 75 mg/L           | 15.05±1.44 cm | 14.54±1.62 cm | 21.31±2.84 cm |

**SI Table 5.** Antioxidant content in rice seedlings treated with ZnMgO<sub>2</sub> NPs.

| Samples                   | Days 40    | Days 60    |
|---------------------------|------------|------------|
| Control                   | 0.10±0.004 | 0.14±0.03  |
| ZnMgO <sub>2</sub> 25mg/L | 0.18±0.02  | 0.39±0.007 |
| ZnMgO <sub>2</sub> 75mg/L | 0.14±0.02  | 0.29±0.07  |
| Urea (U) 25 mg/L          | 0.10±0.008 | 0.20±0.39  |
| Urea (U) 75 mg/L          | 0.25±0.06  | 0.18±0.009 |

Note: Antioxidant content was expressed in terms of mg AAE g<sup>-1</sup> FW

**SI Table 6.**  $\alpha$ -amylase activity in rice seedlings treated with ZnMgO<sub>2</sub> NPs.

| Samples                    | $\alpha$ -amylase activity (on 7 <sup>th</sup> day) |
|----------------------------|-----------------------------------------------------|
| Control                    | 22.73±7.05                                          |
| ZnMgO <sub>2</sub> 25mg/L  | 29.16±1.12                                          |
| ZnMgO <sub>2</sub> 75 mg/L | 33.15±7.70                                          |
| Urea (U) 25mg/L            | 28.51±7.70                                          |
| Urea (U) 75 mg/L           | 27.40±3.78                                          |

Note:  $\alpha$ -amylase activity was expressed in terms of  $\mu\text{mol}/\text{min}$ .

**SI Table 7.** Phenol content in rice seedlings treated with ZnMgO<sub>2</sub> NPs.

| Samples                    | Day 20    | Day 40       |
|----------------------------|-----------|--------------|
| Control                    | 0.07±0.02 | 0.004±0.001  |
| ZnMgO <sub>2</sub> 25 mg/L | 0.08±0.01 | 0.03±0.04    |
| ZnMgO <sub>2</sub> 75 mg/L | 0.10±0.01 | 0.002±0.03   |
| Urea 25 mg/L               | 0.06±0.01 | 0.005±0.006  |
| Urea 75 mg/L               | 0.09±0.03 | 0.001±0.0001 |

Note: Phenol content was expressed in terms of mg GAE g<sup>-1</sup> FW



**SI Table 8.** Flavonoid content in rice seedlings treated with ZnMgO<sub>2</sub> NPs.

| Samples                    | Day 20     | Day 40     |
|----------------------------|------------|------------|
| Control                    | 0.03±0.01  | 0.07±0.03  |
| ZnMgO <sub>2</sub> 25 mg/L | 0.05±0.01  | 0.13±0.02  |
| ZnMgO <sub>2</sub> 75 mg/L | 0.04±0.006 | 0.09±0.02  |
| Urea (U) 25 mg/L           | 0.02±0.002 | 0.09±0.01  |
| Urea (U) 75mg/L            | 0.03±0.01  | 0.07±0.006 |

Note: Flavonoid content was expressed in terms of mg QE g<sup>-1</sup> FW

**SI Table 9.** Dose determination of ZnMgO<sub>2</sub>

(a) Root length

| Concentration              | Root length (Day 10) |
|----------------------------|----------------------|
| 25mg/L ZnMgO <sub>2</sub>  | 6.35±0.79 cm         |
| 100mg/L ZnMgO <sub>2</sub> | 5.39±0.72 cm         |

(b) Shoot length

| Concentration              | Shoot length (Day 10) |
|----------------------------|-----------------------|
| 25mg/L ZnMgO <sub>2</sub>  | 5.32±0.79 cm          |
| 100mg/L ZnMgO <sub>2</sub> | 4.61±0.68 cm          |

## Reference

- 1 L. N. Al-Harbi, G. M. Al-Shammari, P. Subash-Babu, M. A. Mohammed, R. A. Alkredees and A. E. G. A. Yagoub, *Nanomaterials*, DOI:10.3390/nano12193393.
